# Supplementary material for: MiR-181a-5p Delivered by Adipose-Derived Mesenchymal Stem Cell Exosomes Alleviates Klebsiella pneumonia Infection-Induced Lung Injury by Targeting STAT3 Signaling
Source: Hindawi journal article supplement (doi:10.1155/2022/5188895), 2022-12-14

Figure S1

**A**

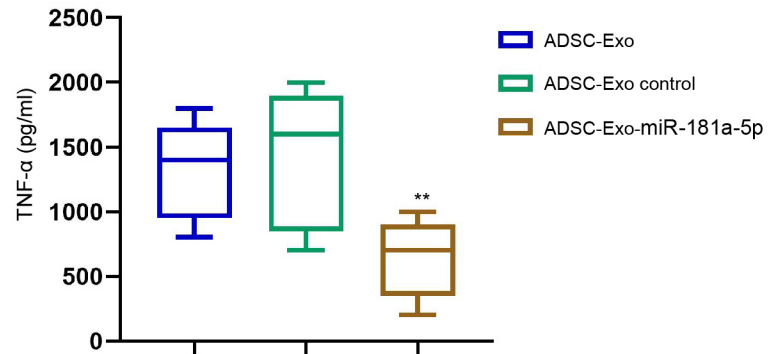

**B**

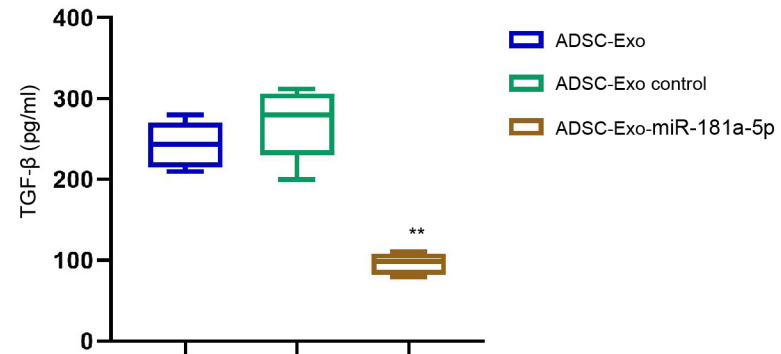

**C**

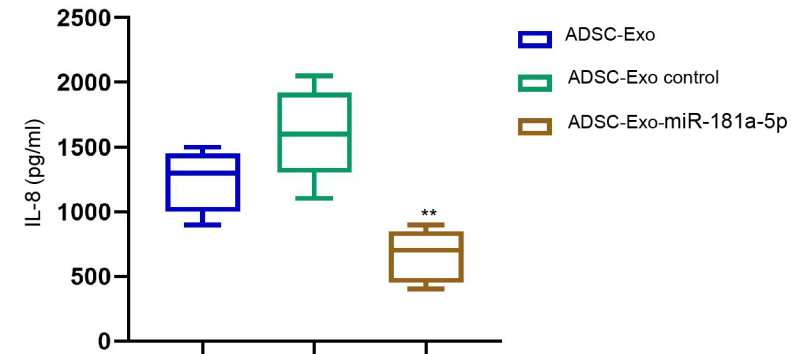

Supplement: f1 [file 5188895.f1.pdf]
